# Supplementary material for: LinkImpute: Fast and Accurate Genotype Imputation for Nonmodel Organisms
Source: Oxford University Press journal article supplement (doi:10.1534/g3.115.021667), 2015-09-25
Supplement: 021667_figures4.pdf [file 021667_figures4.pdf]

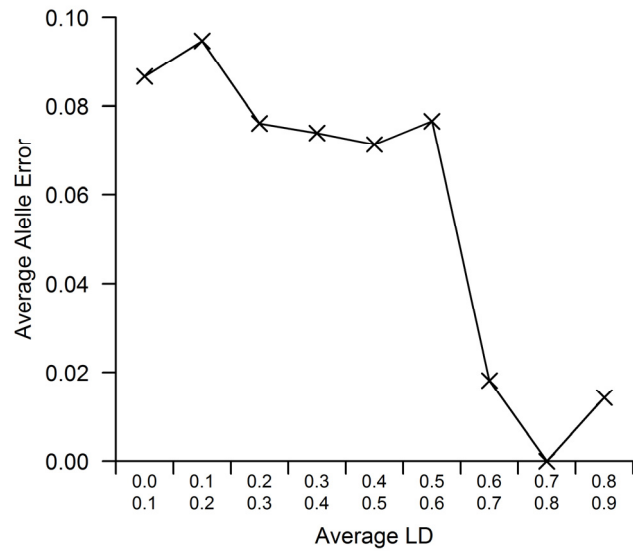

**Figure S4** Imputation accuracy as a function of LD between the imputed SNP and the SNPs used for imputation. LD is binned in bins of size 0.1. The increase between bins 0.7-0.8 and 0.8-0.9 is caused by the low number of SNPs in each bin (60 and 70 respectively) and the low number of wrongly called imputations in each case (0 and 1 respectively).
