# Supplementary material for: LinkImpute: Fast and Accurate Genotype Imputation for Nonmodel Organisms
Source: Oxford University Press journal article supplement (doi:10.1534/g3.115.021667), 2015-09-25
Supplement: 021667_figures9.pdf [file 021667_figures9.pdf]

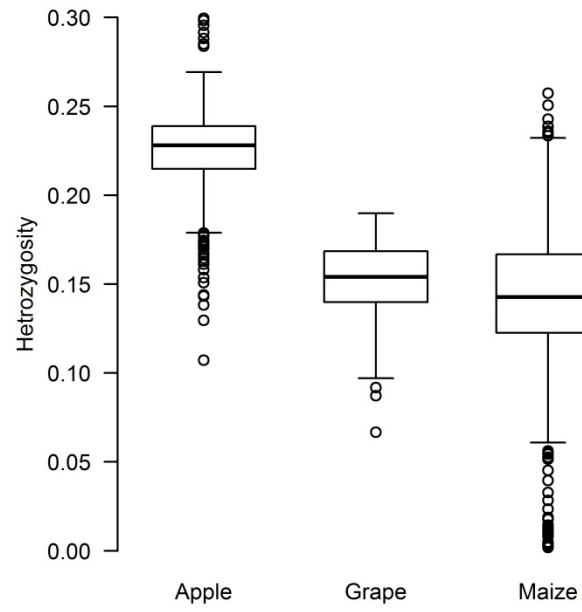

**Figure S9** Box plots of the average heterozygosity by sample for each of our three datasets.
