# Supplementary material for: LinkImpute: Fast and Accurate Genotype Imputation for Nonmodel Organisms
Source: Oxford University Press journal article supplement (doi:10.1534/g3.115.021667), 2015-09-25
Supplement: 021667_tables1.pdf [file 021667_tables1.pdf]

**Table S1 The effect of the constant,  $c$ , in Equation 3 on accuracy.** Accuracy is calculated on the Apple dataset using the given values of  $k$  and  $l$ .

|          | $k$ | 3      |        |        | 5      |        |        | 10     |        |        |
|----------|-----|--------|--------|--------|--------|--------|--------|--------|--------|--------|
|          |     | $l$    | 10     | 20     | 30     | 10     | 20     | 30     | 10     | 20     |
| Constant | 0.1 | 0.9162 | 0.923  | 0.7356 | 0.9198 | 0.9242 | 0.7356 | 0.9229 | 0.9228 | 0.7356 |
|          | 0.2 | 0.9162 | 0.9233 | 0.7356 | 0.9198 | 0.9247 | 0.7356 | 0.9236 | 0.9234 | 0.7356 |
|          | 0.5 | 0.9163 | 0.9238 | 0.7356 | 0.9199 | 0.9248 | 0.7356 | 0.9237 | 0.9232 | 0.7356 |
|          | 1   | 0.9173 | 0.9236 | 0.7356 | 0.9204 | 0.9246 | 0.7356 | 0.9231 | 0.9235 | 0.7356 |
|          | 2   | 0.9172 | 0.9243 | 0.7356 | 0.9206 | 0.9247 | 0.7356 | 0.9223 | 0.9219 | 0.7356 |
|          | 5   | 0.9174 | 0.9237 | 0.7356 | 0.9204 | 0.9234 | 0.7356 | 0.9215 | 0.9214 | 0.7356 |
|          | 10  | 0.9174 | 0.9238 | 0.7356 | 0.9204 | 0.9233 | 0.7356 | 0.9214 | 0.9214 | 0.7356 |
