# Supplementary material for: LinkImpute: Fast and Accurate Genotype Imputation for Nonmodel Organisms
Source: PubMed Central journal article supplement (PMC4632058; doi:10.1534/g3.115.021667), 2015-09-15
Supplement: supp_g3.115.021667_FigureS1.pdf [file supp_g3.115.021667_FigureS1.pdf]

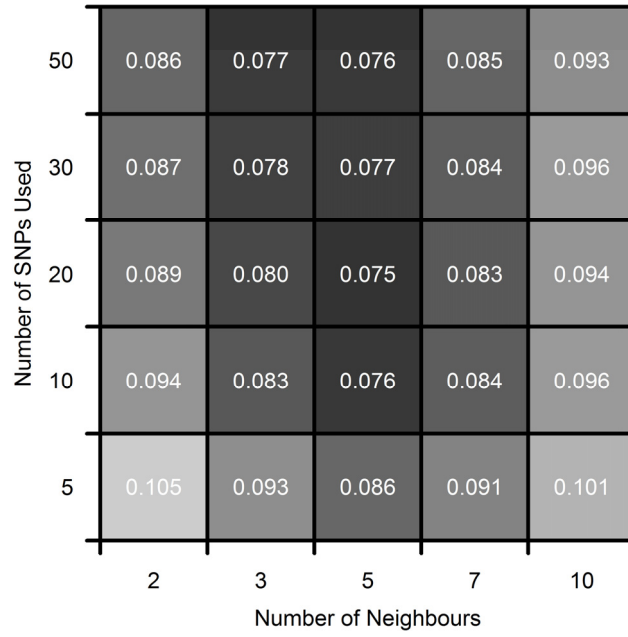

**Figure S1:** Heat map showing genotype imputation error, using LD-kNNi, for different numbers of neighbours ( $k$ ) and number of SNPs used ( $l$ ). Results are shown for the apple dataset and for selected values of  $k$  and  $l$ . Darker boxes indicate less error. We chose  $k = 5$  and  $l = 20$  for this study.
