# Supplementary material for: LinkImpute: Fast and Accurate Genotype Imputation for Nonmodel Organisms
Source: PubMed Central journal article supplement (PMC4632058; doi:10.1534/g3.115.021667), 2015-09-15
Supplement: supp_g3.115.021667_FigureS3.pdf [file supp_g3.115.021667_FigureS3.pdf]

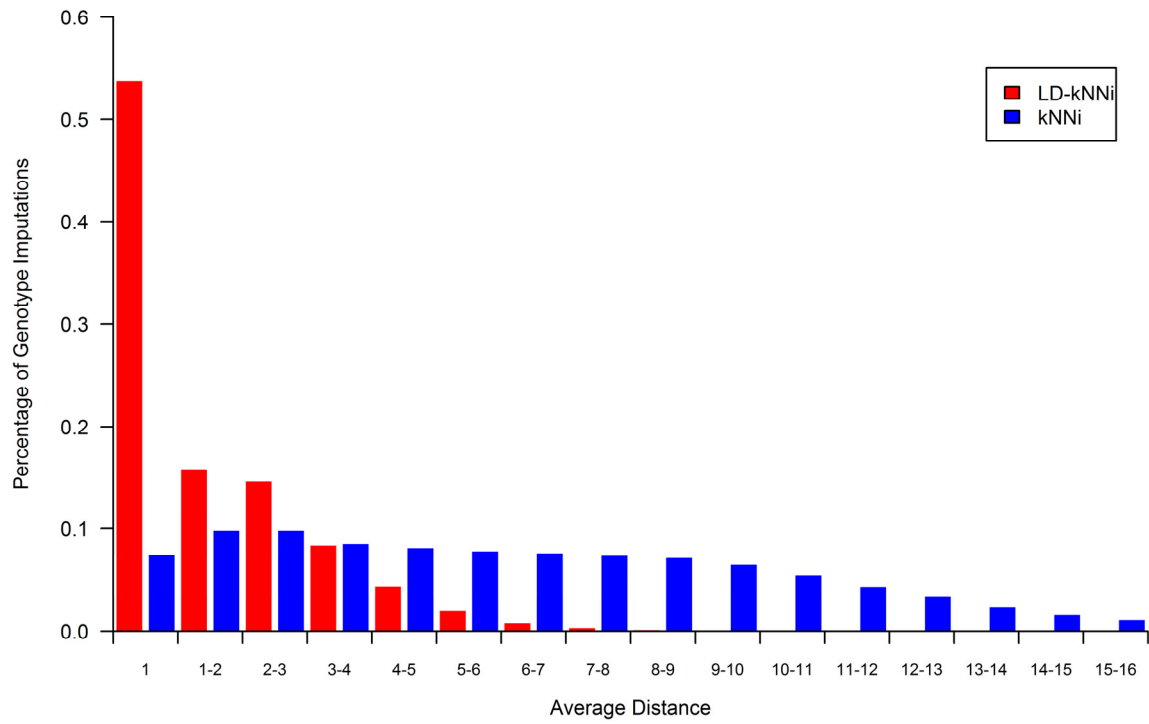

**Figure S3** Average distance to neighbouring samples using kNNi and LD-kNNi. To allow comparison, the  $d_l$  distance measure (Equation 3) is used in each case and both methods use  $k = 5$ . Exactly one is shown as a separate bar due its high frequency. The average distance to neighbouring samples is far lower for LD-kNNi than for kNNi.
