# Supplementary material for: LinkImpute: Fast and Accurate Genotype Imputation for Nonmodel Organisms
Source: PubMed Central journal article supplement (PMC4632058; doi:10.1534/g3.115.021667), 2015-09-15
Supplement: supp_g3.115.021667_FigureS10.pdf [file supp_g3.115.021667_FigureS10.pdf]

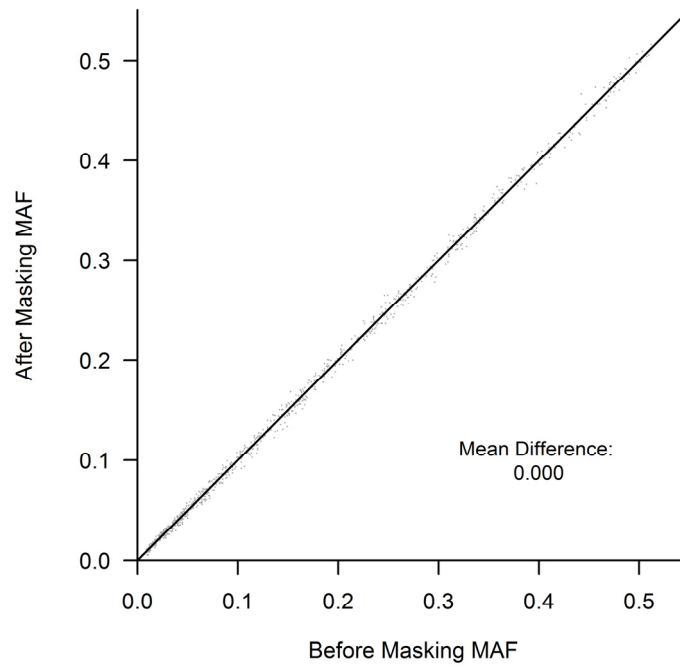

**Figure S10** MAF calculated using the actual MAF (calculated before masking) to the MAF calculated including missing data (after masking).
